# Supplementary material for: Incorporating repeated measurements into prediction models in the critical care setting: a framework, systematic review and meta-analysis
Source: Springer Nature journal article supplement (doi:10.1186/s12874-019-0847-0), 2019-10-26
Supplement: MOESM1 [file 17310850]

## Pubmed

| Number                 | Search terms                                                                                                                                                                                                                                                                                                                                                                                                                                                                                                                                                                                                                                                                                                                                   | hits      |
|------------------------|------------------------------------------------------------------------------------------------------------------------------------------------------------------------------------------------------------------------------------------------------------------------------------------------------------------------------------------------------------------------------------------------------------------------------------------------------------------------------------------------------------------------------------------------------------------------------------------------------------------------------------------------------------------------------------------------------------------------------------------------|-----------|
| 1: methodologic domain | ((repeated[tiab] OR repeatedly[tiab] OR sequential[tiab] OR longitudinal[tiab] OR consecutive[tiab] OR temporal[tiab] OR time[tiab]) AND (measurements[tiab] OR measured[tiab] OR data[tiab] OR sequence[tiab] OR series[tiab])) OR "longitudinal study"[tiab] OR "longitudinal cohort"[tiab]                                                                                                                                                                                                                                                                                                                                                                                                                                                  | 1,332,643 |
| 2: methodologic domain | ("prediction"[tiab] OR "predict"[tiab] OR "prognostic study" OR "prognostic research"[tiab] OR "prognosis"[tiab] OR (risk[tiab] AND event[tiab]) OR (probability[tiab] AND event[tiab]) OR (occurrence[tiab] AND event[tiab]) OR (risk[tiab] AND outcome[tiab]) OR (probability[tiab] AND outcome[tiab]) OR (occurrence[tiab] AND outcome[tiab]) OR "decision support"[Title/Abstract] OR prognosis[Majr])                                                                                                                                                                                                                                                                                                                                     | 993,903   |
| 3: clinical domain     | "intensive care"[tiab] OR "critical care"[tiab] OR "intensive care units"[Mesh] OR "critical care"[Mesh] OR "intermediate care"[tiab] OR "high dependency care"[tiab] OR "step-down"[tiab] OR "step down"[tiab] OR "medium care"[tiab] OR "progressive care"[tiab] OR "cardiologic care unit"[tiab] OR "mimic"                                                                                                                                                                                                                                                                                                                                                                                                                                 | 252,287   |
| 4: outcome             | (discrimination[Title/Abstract] OR discriminate[tiab] OR calibration[Title/Abstract] OR calibrate[Title/Abstract] OR sensitivity[Title/Abstract] OR specificity[Title/Abstract] OR "false positive"[tiab] OR "false negative"[tiab] OR auc[Title/Abstract] OR "area under the curve"[Title/Abstract] OR "c-statistic"[Title/Abstract] OR "c statistic"[Title/Abstract] OR concordance[Title/Abstract] OR ROC[Title/Abstract] OR "receiver operating curve"[Title/Abstract] OR "O:E ratio"[Title/Abstract] OR "observed to expected ratio"[Title/Abstract] OR "discriminative performance"[tiab] OR "prediction error"[tiab] OR "R squared"[tiab] OR "coefficient of determination"[tiab] OR accuracy[tiab] OR predictive value of tests[Majr]) | 1,189,877 |
| 4                      | #1 AND #2 AND #3 AND #4                                                                                                                                                                                                                                                                                                                                                                                                                                                                                                                                                                                                                                                                                                                        | 1083      |

## Embase

| Number                 | Search terms                                                                                                                                                                                                                                                                                                                                                                                                                                                                                                                                                                                    | hits      |
|------------------------|-------------------------------------------------------------------------------------------------------------------------------------------------------------------------------------------------------------------------------------------------------------------------------------------------------------------------------------------------------------------------------------------------------------------------------------------------------------------------------------------------------------------------------------------------------------------------------------------------|-----------|
| 1: methodologic domain | ((repeated:ab,ti OR repeatedly:ab,ti OR sequential:ab,ti OR longitudinal:ab,ti OR consecutive:ab,ti OR temporal:ab,ti OR time:ab,ti) AND (measurements:ab,ti OR measured:ab,ti OR data:ab,ti OR sequence:ab,ti OR series:ab,ti)) OR 'longitudinal study':ab,ti OR 'longitudinal cohort':ab,ti OR 'longitudinal studies'/mj                                                                                                                                                                                                                                                                      | 1,867,761 |
| 2: methodologic domain | 'prediction':ab,ti OR 'predict':ab,ti OR 'prognostic study' OR 'prognostic research':ab,ti OR 'prognosis':ab,ti OR (risk:ab,ti AND event:ab,ti) OR (probability:ab,ti AND event:ab,ti) OR (occurrence:ab,ti AND event:ab,ti) OR (risk:ab,ti AND outcome:ab,ti) OR (probability:ab,ti AND outcome:ab,ti) OR (occurrence:ab,ti AND outcome:ab,ti) OR 'decision support':ab,ti OR 'prognosis'/mj                                                                                                                                                                                                   | 1,360,699 |
| 3: clinical domain     | 'intensive care':ab,ti OR 'critical care':ab,ti OR 'intensive care units'/exp OR 'critical care'/exp OR 'intermediate care':ab,ti OR 'high dependency care':ab,ti OR 'step-down':ab,ti OR 'step down':ab,ti OR 'medium care':ab,ti OR 'progressive care':ab,ti OR 'cardiologic care unit':ab,ti OR 'mimic'                                                                                                                                                                                                                                                                                      | 832,778   |
| 4: outcome             | discrimination:ab,ti OR discriminate:ab,ti OR calibration:ab,ti OR calibrate:ab,ti OR sensitivity:ab,ti OR specificity:ab,ti OR 'false positive':ab,ti OR 'false negative':ab,ti OR auc:ab,ti OR 'area under the curve':ab,ti OR 'c-statistic':ab,ti OR 'c statistic':ab,ti OR concordance:ab,ti OR ROC:ab,ti OR 'receiver operating curve':ab,ti OR 'O:E ratio':ab,ti OR 'observed to expected ratio':ab,ti OR 'discriminative performance':ab,ti OR 'prediction error':ab,ti OR 'R squared':ab,ti OR 'coefficient of determination':ab,ti OR accuracy:ab,ti OR 'predictive value of tests'/mj | 1,817,089 |
| 5: combined            | #1 AND #2 AND #3 AND #4 AND [embase]/lim NOT ([embase]/lim AND [medline]/lim)                                                                                                                                                                                                                                                                                                                                                                                                                                                                                                                   | 1,889     |
